# Supplementary material for: Comparative transcriptome analysis of cucumber fruit tissues reveals novel regulatory genes in ascorbic acid biosynthesis
Source: PeerJ journal article supplement (doi:10.7717/peerj.18327), 2024-10-25
Supplement: Supplementary_Table_1.xlsx [file Supplementary_Table_1.xlsx]

## Sheet: Table S1. List of primers used 
Supplemental Table 1. List of primers used in qPCR analysis.
Gene	Forward primer (5’-3’)	Reverse primer (5’-3’)	Product Size	Tm	Primer Blast result	Primer Blast result gene
CsaV3_5G014110 (PMM)	TCGAAATGGGATGCTTAAC	CTCCCGAAGGATAGAAACC	124	59	XM_031885923.1	LOC101212422
CsaV3_2G004170 (GME)	TCTAGTGCTTGCATCTATCCTG	AGCTTCTCCAGACCGTAGG	110	60	XM_004139184.3	LOC101222554
CsaV3_7G022020 (GGP)	GAAGAGGCCAACCGAGTTTC	ATCGATCCTTTGTGGCAAGC	259	60	XM_004139749.3	LOC101205337
CsaV3_6G047320 (APX4)	TCACACATTGGGTAGGGCA	CATCCTCATCGGCAGCATA	203	60	KC839995.1	KC839995.1
CsaV3_7G001430 (AAO3)	TCAGCAGCAAGTGTCTCTGG	GACAGCATATCGCTGCTTGC	216	60	XP_004144874.1	LOC101222522
CsaV3_3G011090 (GR2)	CGTGGAAAGATTCTGGATGAAC	GATGCCAGCAAATTCTAGAGC	216	60	XM_011660964.2	LOC101217298
Actin	TCCACGAGACTACCTACAACTC	GCTCATACGGTCAGCGAT	121	60	/	/
