# Supplementary material for: Comparative transcriptome analysis of cucumber fruit tissues reveals novel regulatory genes in ascorbic acid biosynthesis
Source: PeerJ journal article supplement (doi:10.7717/peerj.18327), 2024-10-25
Supplement: Supplementary_Table_2.xlsx [file Supplementary_Table_2.xlsx]

## Sheet: Sheet1
ITEM TO CHECK	IMPORTANCE	CHECKLIST
EXPERIMENTAL DESIGN
Definition of experimental and control groups	E	Present in materials and methods
Number within each group	E	Present in materials and methods
Assay carried out by core lab or investigator's lab?	D	Investigator’s laboratory
Acknowledgement of authors' contributions	D	Present in Contributions
SAMPLE
Description	E	Present in materials and methods
Volume/mass of sample processed	D	NA
Microdissection or macrodissection	E	NA
Processing procedure	E	Present in materials and methods
If frozen - how and how quickly?	E	Present in materials and methods
If fixed - with what, how quickly?	E	NA
Sample storage conditions and duration (especially for FFPE samples)	E	Present in materials and methods
NUCLEIC ACID EXTRACTION
Procedure and/or instrumentation	E	Present in materials and methods
Name of kit and details of any modifications	E	Present in materials and methods
Source of additional reagents used	D	NA
Details of DNase or RNAse treatment	E	Present in materials and methods
Contamination assessment (DNA or RNA)	E	Present in materials and methods
Nucleic acid quantification	E	Present in materials and methods
Instrument and method	E	Present in materials and methods
Purity (A260/A280)	D	NA
Yield	D	Present in Table S3
RNA integrity method/instrument	E	Present in materials and methods
RIN/RQI or Cq of 3' and 5' transcripts	E	Present in Table S3
Electrophoresis traces	D	NA
Inhibition testing (Cq dilutions, spike or other)	E	NA
REVERSE TRANSCRIPTION
Complete reaction conditions	E	Present in materials and methods
Amount of RNA and reaction volume	E	Present in materials and methods
Priming oligonucleotide (if using GSP) and concentration	E	Present in materials and methods
Reverse transcriptase and concentration	E	Present in materials and methods
Temperature and time	E	Present in materials and methods
Manufacturer of reagents and catalogue numbers	D	NA
Cqs with and without RT	D*	NA
Storage conditions of cDNA	D	NA
qPCR TARGET INFORMATION
If multiplex, efficiency and LOD of each assay.	E	Present in Table S1
Sequence accession number	E	Present in Table S1
Location of amplicon	D	NA
Amplicon length	E	Present in Table S1
In silico specificity screen (BLAST, etc)	E	Present in Table S1
Pseudogenes, retropseudogenes or other homologs?	D	NA
Sequence alignment	D	NA
Secondary structure analysis of amplicon	D	NA
Location of each primer by exon or intron (if applicable)	E	NA
What splice variants are targeted?	E	NA
qPCR OLIGONUCLEOTIDES
Primer sequences	E	Present in Table S1
RTPrimerDB Identification Number	D	NA
Probe sequences	D**	NA
Location and identity of any modifications	E	NA
Manufacturer of oligonucleotides	D	Present in materials and methods
Purification method	D	NA
qPCR PROTOCOL
Complete reaction conditions	E	Present in materials and methods
Reaction volume and amount of cDNA/DNA	E	Present in materials and methods
Primer, (probe), Mg++ and dNTP concentrations	E	Present in materials and methods
Polymerase identity and concentration	E	Present in materials and methods
Buffer/kit identity and manufacturer	E	Present in materials and methods
Exact chemical constitution of the buffer	D	NA
Additives (SYBR Green I, DMSO, etc.)	E	Present in materials and methods
Manufacturer of plates/tubes and catalog number	D	NA
Complete thermocycling parameters	E	Present in materials and methods
Reaction setup (manual/robotic)	D	NA
Manufacturer of qPCR instrument	E	Present in materials and methods
qPCR VALIDATION
Evidence of optimisation (from gradients)	D	NA
Specificity (gel, sequence, melt, or digest)	E	Melting curve analysis had a single peak
For SYBR Green I, Cq of the NTC	E	NA
Standard curves with slope and y-intercept	E	NA
PCR efficiency calculated from slope	E	Present in materials and methods
Confidence interval for PCR efficiency or standard error	D	NA
r2 of standard curve	E	NA
Linear dynamic range	E	NA
Cq variation at lower limit	E	NA
Confidence intervals throughout range	D	NA
Evidence for limit of detection	E	NA
If multiplex, efficiency and LOD of each assay.	E	NA
DATA ANALYSIS
qPCR analysis program (source, version)	E	Present in materials and methods
Cq method determination	E	Present in materials and methods
Outlier identification and disposition	E	No outliers were identified
Results of NTCs	E	No available Cq value for all NTCs
Justification of number and choice of reference genes	E	Present in materials and methods
Description of normalisation method	E	Present in materials and methods
Number and concordance of biological replicates	D	NA
Number and stage (RT or qPCR) of technical replicates	E	Present in materials and methods
Repeatability (intra-assay variation)	E	Present in Table S6 and S7
Reproducibility (inter-assay variation, %CV)	D	NA
Power analysis	D	NA
Statistical methods for result significance	E	NA
Software (source, version)	E	NA
Cq or raw data submission using RDML	D	NA
