# Supplementary material for: Comparative transcriptome analysis of cucumber fruit tissues reveals novel regulatory genes in ascorbic acid biosynthesis
Source: PeerJ journal article supplement (doi:10.7717/peerj.18327), 2024-10-25
Supplement: Supplementary_Table_3.xlsx [file Supplementary_Table_3.xlsx]

## Sheet: Sheet1
RNA Quality assessment for transcriptome analysis
Sample	Concentration (μg/μL)	Yield (μg)	OD260/280	OD260/230	Quality Class
A1_1	0.38	16.04	2.16	1.51	A
A1_2	0.29	12.28	2.14	1.04	A
A1_3	0.22	9.43	2.17	0.74	A
A2_1	0.14	5.76	2.08	1.56	A
A2_2	0.16	6.52	2.13	1.01	A
A2_3	0.12	5.04	2.08	1.11	A
A3_1	0.22	9.29	2.1	1.15	A
A3_2	0.26	10.83	2.15	1.04	A
A3_3	0.27	11.24	2.14	1.19	A
B1_1	0.64	27.05	2.16	2.28	A
B1_2	0.41	17.14	2.15	1.07	A
B1_3	0.31	13.12	2.18	0.74	A
B2_1	0.13	5.33	2.15	0.42	A
B2_2	0.14	5.9	2.02	1.23	A
B2_3	0.12	4.86	2.14	1.34	A
B3_1	0.23	14.23	2.14	2.11	A
B3_2	0.27	9.63	2.15	0.99	A
B3_3	0.37	11.27	2.13	0.9	A
RNA Quality assessment for RT-qPCR analysis
Sample	Concentration (ng/mL)	Volume (mL)	Yield (mg)	OD260/280	OD260/230	Quality Class
A1_1	672	100	67.2	1.825	1.9	A
A1_2	1016	100	101.6	1.934	1.88	A
A1_3	1316	100	131.6	1.9	1.9	A
A2_1	1100	100	110	1.86	1.93	A
A2_2	972	100	97.2	1.89	1.89	A
A2_3	692	100	69.2	1.93	1.94	A
A3_1	756	100	75.6	1.96	1.97	A
A3_2	1010	100	101	1.95	1.94	A
A3_3	900	100	90	1.92	1.95	A
B1_1	654	100	65.4	1.87	1.87	A
B1_2	932	100	93.2	1.83	1.85	A
B1_3	1015	100	101.5	1.89	1.88	A
B2_1	543	100	54.3	1.91	1.86	A
B2_2	782	100	78.2	1.95	1.86	A
B2_3	562	100	56.2	1.88	1.88	A
B3_1	1231	100	123.1	1.87	1.9	A
B3_2	779	100	77.9	1.92	1.94	A
B3_3	810	100	81	1.97	1.96	A
