# Supplementary material for: Comparative transcriptome analysis of cucumber fruit tissues reveals novel regulatory genes in ascorbic acid biosynthesis
Source: PeerJ journal article supplement (doi:10.7717/peerj.18327), 2024-10-25
Supplement: Supplementary_Table_4.xlsx [file Supplementary_Table_4.xlsx]

## Sheet: Table S2. Overview of the tran 
Supplemental Table S2. Overview of the transcriptome sequencing.
Sample	Valid reads	Mapped-reads	Q20 (%)	Q30 (%)
A1_1	47783822	45546646(95.32%)	99.94	96.41
A1_2	46866872	44734980(95.45%)	99.94	96.68
A1_3	41932306	39856019(95.05%)	99.94	96.42
A2_1	42908666	40860791(95.23%)	99.94	96.55
A2_2	42440842	40469284(95.35%)	99.95	96.6
A2_3	40603872	38561361(94.97%)	99.93	96.43
A3_1	40546950	38615684(95.24%)	99.94	96.46
A3_2	41086682	39102004(95.17%)	99.94	96.47
A3_3	45791212	43818815(95.69%)	99.95	96.82
B1_1	45736828	43752251(95.66%)	99.96	97.13
B1_2	45437842	43335955(95.37%)	99.95	97.01
B1_3	45944960	43919350(95.59%)	99.96	97.08
B2_1	46721140	44654283(95.58%)	99.96	96.94
B2_2	43699024	41680618(95.38%)	99.95	96.92
B2_3	43494556	41493489(95.40%)	99.95	96.93
B3_1	43741722	41738928(95.42%)	99.95	96.87
B3_2	46548210	45029014(96.74%)	99.96	97.05
B3_3	50305582	48737569(96.88%)	99.96	97.28
