# Supplementary material for: Comparative transcriptome analysis of cucumber fruit tissues reveals novel regulatory genes in ascorbic acid biosynthesis
Source: PeerJ journal article supplement (doi:10.7717/peerj.18327), 2024-10-25
Supplement: Supplementary_Table_5.xlsx [file Supplementary_Table_5.xlsx]

## Sheet: Sheet1
Table S5 Power analysis between different groups
group	depth	n1	n2	CV1	CV2	alpha	Power (effect=2)	Power (effect=3)	Power (effect=4)
A2VSA1	6.92	3	3	0.266761	0.289125	0.05	0.435538	0.813073	0.949015
A3VSA2	6.57	3	3	0.282486	0.266761	0.05	0.427979	0.804775	0.944858
A3VSA1	6.86	3	3	0.282486	0.289125	0.05	0.429261	0.8062	0.945583
B2VSB1	7.07	3	3	0.267585	0.287541	0.05	0.440458	0.818343	0.951578
B3VSB1	7.23	3	3	0.287829	0.287541	0.05	0.436486	0.814096	0.949517
B3VSB2	7.13	3	3	0.287829	0.267585	0.05	0.442399	0.820393	0.952559
