# Supplementary material for: Comparative transcriptome analysis of cucumber fruit tissues reveals novel regulatory genes in ascorbic acid biosynthesis
Source: PeerJ journal article supplement (doi:10.7717/peerj.18327), 2024-10-25
Supplement: Supplementary_Table_6.xlsx [file Supplementary_Table_6.xlsx]

## Sheet: Table S3 DEGs in H105
Supplemental Table S6 DEGs in H105.
gene	gene_id	gene_name	EntrezID	transcript_id	GO	KEGG	KO_ENTRY	EC	Description	trans_type	FPKM.A1_1	FPKM.A1_2	FPKM.A1_3	FPKM.A2_1	FPKM.A2_2	FPKM.A2_3	FPKM.A3_1	FPKM.A3_2	FPKM.A3_3	pval	qval	significant
PMI	CsaV3_5G004970	CsaV3_5G004970	14387	CsaV3_5G004970.1	GO:0004476(mannose-6-phosphate isomerase activity);GO:0006000(fructose metabolic process);GO:0006013(mannose metabolic process);GO:0008270(zinc ion binding);GO:0009298(GDP-mannose biosynthetic process)	00051(Fructose and mannose metabolism);00520(Amino sugar and nucleotide sugar metabolism)	K01809	EC:5.3.1.8	PREDICTED: mannose-6-phosphate isomerase 1 [Cucumis sativus]	NA	22.0613	20.4252	39.3623	17.7764	22.7112	24.059	8.47713	7.41533	7.789	1.97082e-10	9.75004e-10	yes
PMM	CsaV3_5G014110	CsaV3_5G014110	14977	CsaV3_5G014110.1	GO:0004615(phosphomannomutase activity);GO:0005737(cytoplasm);GO:0006000(fructose metabolic process);GO:0006013(mannose metabolic process);GO:0009298(GDP-mannose biosynthetic process)	00051(Fructose and mannose metabolism);00520(Amino sugar and nucleotide sugar metabolism)	K17497	EC:5.4.2.8	PREDICTED: phosphomannomutase [Cucumis sativus]	NA	3.67408	3.21255	3.52375	2.17591	1.55838	1.09621	2.19864	3.02806	3.83164	0.00175348	0.00325268	yes
GME	CsaV3_2G004170	CsaV3_2G004170	3878	CsaV3_2G004170.1	GO:0003824(catalytic activity);GO:0050662(coenzyme binding)	00053(Ascorbate and aldarate metabolism);00520(Amino sugar and nucleotide sugar metabolism)	K10046	EC:5.1.3.18;EC:5.1.3.-	PREDICTED: GDP-mannose 3,5-epimerase 1 [Cucumis sativus]	NA	15.5015	14.7673	16.8862	9.9139	8.99689	5.66538	8.40973	10.1469	13.4551	0.000877856	0.0017203	yes
GGP	CsaV3_7G022020	CsaV3_7G022020	22179	CsaV3_7G022020.1	GO:0080048(GDP-D-glucose phosphorylase activity)	00053(Ascorbate and aldarate metabolism)	K14190	EC:2.7.7.69	PREDICTED: GDP-L-galactose phosphorylase 1 [Cucumis sativus]	NA	161.467	138.14	165.805	92.6473	111.188	154.464	66.9304	60.9766	59.2656	8.1478e-08	2.93848e-07	yes
GPP	CsaV3_1G017100	CsaV3_1G017100	1602	CsaV3_1G017100.1	GO:0046854(phosphatidylinositol phosphorylation)	00053(Ascorbate and aldarate metabolism);00562(Inositol phosphate metabolism);04070(Phosphatidylinositol signaling system)	K10047	EC:3.1.3.25;EC:3.1.3.93	PREDICTED: inositol monophosphatase [Cucumis sativus]	NA	13.8443	12.8239	10.0486	30.5532	26.8389	14.4044	16.5304	18.4756	23.6334	0.00338838	0.0059594	yes
GPP	CsaV3_2G015040	CsaV3_2G015040	4848	CsaV3_2G015040.1	GO:0004401(histidinol-phosphatase activity);GO:0006547(histidine metabolic process);GO:0046854(phosphatidylinositol phosphorylation)	00053(Ascorbate and aldarate metabolism);00562(Inositol phosphate metabolism);00340(Histidine metabolism);04070(Phosphatidylinositol signaling system)	K18649	EC:3.1.3.25;EC:3.1.3.93	PREDICTED: bifunctional phosphatase IMPL2, chloroplastic [Cucumis sativus]	NA	2.28463	1.74938	2.01563	0.978815	0.854711	0.744774	0.897778	1.83026	1.97397	0.00149512	0.00280691	yes
APX	CsaV3_7G000930	CsaV3_7G000930	21159	CsaV3_7G000930.1	GO:0004601(peroxidase activity);GO:0006979(response to oxidative stress);GO:0020037(heme binding);GO:0055114(oxidation-reduction process)	00053(Ascorbate and aldarate metabolism);00480(Glutathione metabolism)	K00434	EC:1.11.1.11	PREDICTED: L-ascorbate peroxidase 3, peroxisomal [Cucumis sativus]	NA	48.868	50.8207	46.993	12.0712	12.9769	13.7321	44.6634	46.7751	51.2702	1.04865e-21	1.43406e-20	yes
APX	CsaV3_2G032090	CsaV3_2G032090	5950	CsaV3_2G032090.1	GO:0004601(peroxidase activity);GO:0006979(response to oxidative stress);GO:0020037(heme binding);GO:0055114(oxidation-reduction process)	00053(Ascorbate and aldarate metabolism);00480(Glutathione metabolism)	K00434	EC:1.11.1.11	PREDICTED: putative L-ascorbate peroxidase 6 isoform X1 [Cucumis sativus]	NA	2.763	2.9737	3.84532	1.92273	0.865791	0.677298	3.87997	3.34591	4.80138	2.282e-05	5.82868e-05	yes
APX	CsaV3_6G047320	CsaV3_6G047320	20476	CsaV3_6G047320.1	GO:0004601(peroxidase activity);GO:0006979(response to oxidative stress);GO:0020037(heme binding);GO:0055114(oxidation-reduction process)	00053(Ascorbate and aldarate metabolism);00480(Glutathione metabolism)	K00434	EC:1.11.1.11	PREDICTED: probable L-ascorbate peroxidase 3 [Cucumis sativus]	NA	2.58261	2.16424	2.79495	5.18029	4.91238	7.68788	2.77203	4.42023	3.84047	0.000152397	0.000341836	yes
APX	CsaV3_1G033510	CsaV3_1G033510	2343	CsaV3_1G033510.1	GO:0004601(peroxidase activity);GO:0006979(response to oxidative stress);GO:0020037(heme binding);GO:0055114(oxidation-reduction process)	00053(Ascorbate and aldarate metabolism);00480(Glutathione metabolism)	K00434	EC:1.11.1.11	L-ascorbate peroxidase, cytosolic-like [Cucumis sativus]	NA	571.172	501.919	530.5	262.296	277.816	250.815	446.962	460.228	571.915	3.07815e-06	8.96883e-06	yes
AAO	CsaV3_6G045670	CsaV3_6G045670	20311	CsaV3_6G045670.1	GO:0005507(copper ion binding);GO:0005576(extracellular region);GO:0016491(oxidoreductase activity);GO:0055114(oxidation-reduction process)	00053(Ascorbate and aldarate metabolism)	K00423	EC:1.10.3.3	PREDICTED: L-ascorbate oxidase [Cucumis sativus]	NA	13.0874	17.0316	3.48778	4.9177	15.7201	42.2903	1.99892	1.03134	1.42422	1.55502e-08	6.15632e-08	yes
AAO	CsaV3_7G003530	CsaV3_7G003530	21419	CsaV3_7G003530.1	GO:0005507(copper ion binding);GO:0016491(oxidoreductase activity);GO:0055114(oxidation-reduction process)	NA	NA	NA	PREDICTED: L-ascorbate oxidase homolog [Cucumis sativus]	NA	19.3372	33.2264	16.0554	8.25495	19.0881	37.6319	4.28905	1.60271	1.20766	3.46296e-10	1.66736e-09	yes
AAO	CsaV3_7G001430	CsaV3_7G001430	21209	CsaV3_7G001430.1	GO:0005507(copper ion binding);GO:0016491(oxidoreductase activity);GO:0055114(oxidation-reduction process)	NA	NA	NA	PREDICTED: L-ascorbate oxidase homolog [Cucumis sativus]	NA	12.1983	12.88	15.5449	19.6365	22.2692	32.5869	8.96768	8.03402	7.86352	9.29725e-11	4.77868e-10	yes
AAO	CsaV3_6G043000	CsaV3_6G043000	20044	CsaV3_6G043000.1	GO:0005507(copper ion binding);GO:0016491(oxidoreductase activity);GO:0055114(oxidation-reduction process)	NA	NA	NA	PREDICTED: L-ascorbate oxidase homolog [Cucumis sativus]	NA	1.4398	1.33204	1.80839	2.88413	3.97806	3.8583	4.54134	3.82471	3.09719	4.0815e-06	1.16585e-05	yes
AAO	CsaV3_1G042210	CsaV3_1G042210	3105	CsaV3_1G042210.1	GO:0005507(copper ion binding);GO:0005576(extracellular region);GO:0016491(oxidoreductase activity);GO:0055114(oxidation-reduction process)	00053(Ascorbate and aldarate metabolism)	K00423	EC:1.10.3.3	PREDICTED: L-ascorbate oxidase [Cucumis sativus]	NA	95.4992	120.64	81.343	62.1928	34.0387	16.2102	20.5189	20.0863	28.3252	2.76426e-09	1.20095e-08	yes
MDHAR	CsaV3_3G005990	CsaV3_3G005990	7007	CsaV3_3G005990.1	GO:0016491(oxidoreductase activity);GO:0050660(flavin adenine dinucleotide binding);GO:0055114(oxidation-reduction process)	00053(Ascorbate and aldarate metabolism)	K08232	EC:1.6.5.4	PREDICTED: monodehydroascorbate reductase-like [Cucumis sativus]	NA	4.87941	3.89601	4.59978	7.05939	6.67617	8.42479	5.92473	7.68126	5.67255	0.0157165	0.024082	yes
DHAR	CsaV3_5G006680	CsaV3_5G006680	14558	CsaV3_5G006680.1	GO:0005515(protein binding)	00053(Ascorbate and aldarate metabolism);00480(Glutathione metabolism)	K21888	EC:1.8.5.1;EC:2.5.1.18	PREDICTED: glutathione S-transferase DHAR2 [Cucumis sativus]	NA	40.3303	39.0818	41.0279	10.8181	9.34762	11.0713	63.1475	61.6014	66.7785	7.60626e-34	2.20206e-32	yes
UGDH	CsaV3_1G002780	CsaV3_1G002780	279	CsaV3_1G002780.1	NA	00040(Pentose and glucuronate interconversions);00053(Ascorbate and aldarate metabolism);00520(Amino sugar and nucleotide sugar metabolism)	K00012	EC:1.1.1.22	PREDICTED: UDP-glucose 6-dehydrogenase 1 [Cucumis sativus]	NA	6.75731	23.3094	6.59082	4.37168	10.8469	18.0575	5.13123	4.06025	3.54177	0.00287873	0.00512855	yes
UGDH	CsaV3_6G033570	CsaV3_6G033570	19200	CsaV3_6G033570.1	GO:0000271(polysaccharide biosynthetic process);GO:0003979(UDP-glucose 6-dehydrogenase activity);GO:0005982(starch metabolic process);GO:0005985(sucrose metabolic process);GO:0009117(nucleotide metabolic process);GO:0051287(NAD binding);GO:0055114(oxidation-reduction process)	00040(Pentose and glucuronate interconversions);00053(Ascorbate and aldarate metabolism);00520(Amino sugar and nucleotide sugar metabolism)	K00012	EC:1.1.1.22	PREDICTED: UDP-glucose 6-dehydrogenase 1 [Cucumis sativus]	NA	0.94576	0.570207	1.26643	0.335183	0.01896	0.180522	0.429578	0.148931	0.569564	0.0036955	0.00644799	yes
UGDH	CsaV3_4G008770	CsaV3_4G008770	11990	CsaV3_4G008770.1	GO:0003979(UDP-glucose 6-dehydrogenase activity);GO:0005982(starch metabolic process);GO:0005985(sucrose metabolic process);GO:0009117(nucleotide metabolic process);GO:0051287(NAD binding);GO:0055114(oxidation-reduction process)	00040(Pentose and glucuronate interconversions);00053(Ascorbate and aldarate metabolism);00520(Amino sugar and nucleotide sugar metabolism)	K00012	EC:1.1.1.22	PREDICTED: UDP-glucose 6-dehydrogenase 1 [Cucumis sativus]	NA	74.0837	100.927	86.4067	132.564	172.231	261.109	79.742	62.5409	72.3015	3.01233e-08	1.1492e-07	yes
GAE	CsaV3_2G011740	CsaV3_2G011740	4518	CsaV3_2G011740.1	GO:0005975(carbohydrate metabolic process);GO:0016857(racemase and epimerase activity, acting on carbohydrates and derivatives);GO:0050662(coenzyme binding)	00520(Amino sugar and nucleotide sugar metabolism)	K08679	EC:5.1.3.6	PREDICTED: UDP-glucuronate 4-epimerase 6 [Cucumis sativus]	NA	8.7782	9.23722	10.806	18.7042	15.071	9.81906	14.6686	13.7511	18.1026	0.0222367	0.0330029	yes
GAE	CsaV3_3G009770	CsaV3_3G009770	7385	CsaV3_3G009770.1	GO:0005975(carbohydrate metabolic process);GO:0016857(racemase and epimerase activity, acting on carbohydrates and derivatives);GO:0050662(coenzyme binding)	00520(Amino sugar and nucleotide sugar metabolism)	K08679	EC:5.1.3.6	PREDICTED: UDP-glucuronate 4-epimerase 3 [Cucumis sativus]	NA	0.758592	1.3453	0.995102	1.47803	1.90035	3.36299	5.2703	5.24622	4.21386	3.6651e-10	1.75934e-09	yes
GAE	CsaV3_1G029310	CsaV3_1G029310	1923	CsaV3_1G029310.1	GO:0005975(carbohydrate metabolic process);GO:0016857(racemase and epimerase activity, acting on carbohydrates and derivatives);GO:0050662(coenzyme binding)	00520(Amino sugar and nucleotide sugar metabolism)	K08679	EC:5.1.3.6	PREDICTED: UDP-glucuronate 4-epimerase 1-like [Cucumis sativus]	NA	0.728966	0.733806	0.634462	0.987711	2.62835	4.05722	0.625691	0.655621	0.740801	7.47727e-07	2.37533e-06	yes
GAE	CsaV3_3G003130	CsaV3_3G003130	6721	CsaV3_3G003130.1	GO:0005975(carbohydrate metabolic process);GO:0016857(racemase and epimerase activity, acting on carbohydrates and derivatives);GO:0050662(coenzyme binding)	00520(Amino sugar and nucleotide sugar metabolism)	K08679	EC:5.1.3.6	PREDICTED: UDP-glucuronate 4-epimerase 3 [Cucumis sativus]	NA	25.8502	9.95284	7.97419	4.47196	4.71655	6.72965	4.32085	4.00155	6.32408	7.81086e-06	2.14038e-05	yes
MIOX	CsaV3_3G023420	CsaV3_3G023420	8750	CsaV3_3G023420.1	GO:0005506(iron ion binding);GO:0005737(cytoplasm);GO:0016788(hydrolase activity, acting on ester bonds);GO:0019310(inositol catabolic process);GO:0050113(inositol oxygenase activity);GO:0055114(oxidation-reduction process)	00053(Ascorbate and aldarate metabolism);00562(Inositol phosphate metabolism)	K00469	EC:1.13.99.1	PREDICTED: GDSL esterase/lipase APG-like [Cucumis sativus]	NA	5.07046	4.857	5.89458	0.679745	0.65645	0.227789	0.457293	0.355681	0.59964	4.27774e-28	8.74094e-27	yes
MIOX	CsaV3_2G001660	CsaV3_2G001660	3627	CsaV3_2G001660.1	GO:0005506(iron ion binding);GO:0005737(cytoplasm);GO:0019310(inositol catabolic process);GO:0050113(inositol oxygenase activity);GO:0055114(oxidation-reduction process)	00053(Ascorbate and aldarate metabolism);00562(Inositol phosphate metabolism)	K00469	EC:1.13.99.1	PREDICTED: inositol oxygenase 2 [Cucumis melo]	NA	2.13838	1.41286	2.22895	1.77069	1.55866	1.3403	1.15936	1.60633	1.79288	0.46189	0.502702	no
MIOX	CsaV3_1G040000	CsaV3_1G040000	2884	CsaV3_1G040000.1	GO:0005506(iron ion binding);GO:0005737(cytoplasm);GO:0019310(inositol catabolic process);GO:0050113(inositol oxygenase activity);GO:0055114(oxidation-reduction process)	00053(Ascorbate and aldarate metabolism);00562(Inositol phosphate metabolism)	K00469	EC:1.13.99.1	PREDICTED: inositol oxygenase 2 [Cucumis sativus]	NA	10.1154	17.175	16.7754	62.5187	69.5031	43.3104	44.3124	45.1785	53.5009	1.66818e-13	1.13476e-12	yes
UDPase	CsaV3_6G034020	CsaV3_6G034020	19245	CsaV3_6G034020.1	GO:0008152(metabolic process);GO:0070569(uridylyltransferase activity)	00040(Pentose and glucuronate interconversions);00052(Galactose metabolism);00053(Ascorbate and aldarate metabolism);00520(Amino sugar and nucleotide sugar metabolism)	K12447	EC:2.7.7.64	PREDICTED: UDP-sugar pyrophosphorylase [Cucumis sativus]	NA	17.1504	11.3562	11.8322	35.7509	32.6766	33.1993	51.1124	53.1693	54.9378	1.3536e-17	1.33805e-16	yes
UGTs	CsaV3_1G009900	CsaV3_1G009900	990	CsaV3_1G009900.1	GO:0046983(protein dimerization activity)	00040(Pentose and glucuronate interconversions);00053(Ascorbate and aldarate metabolism);00520(Amino sugar and nucleotide sugar metabolism)	K16190	EC:2.7.1.43	PREDICTED: transcription factor ICE1-like isoform X1 [Cucumis sativus]	NA	8.33475	5.65913	6.78003	14.0594	14.5382	10.2164	19.877	23.5768	26.8239	4.83952e-12	2.85008e-11	yes
UGTs	CsaV3_3G027730	CsaV3_3G027730	8974	CsaV3_3G027730.1	GO:0046983(protein dimerization activity)	00040(Pentose and glucuronate interconversions);00053(Ascorbate and aldarate metabolism);00520(Amino sugar and nucleotide sugar metabolism)	K16190	EC:2.7.1.43	PREDICTED: transcription factor ICE1 [Cucumis sativus]	NA	5.26867	6.47867	6.61347	1.15097	1.91824	3.15807	2.0693	1.90783	2.12101	5.6599e-09	2.37243e-08	yes
UGTs	CsaV3_3G046060	CsaV3_3G046060	10708	CsaV3_3G046060.1	NA	00040(Pentose and glucuronate interconversions);00053(Ascorbate and aldarate metabolism);00520(Amino sugar and nucleotide sugar metabolism)	K16190	EC:2.7.1.43	PREDICTED: protein Simiate [Cucumis sativus]	NA	10.788	7.58449	7.91695	8.8075	8.44431	7.14568	11.9247	11.7749	12.9643	0.0304243	0.0438598	yes
AKRs	CsaV3_4G025330	CsaV3_4G025330	12638	CsaV3_4G025330.1	GO:0016491(oxidoreductase activity);GO:0055114(oxidation-reduction process)	00010(Glycolysis / Gluconeogenesis);00040(Pentose and glucuronate interconversions);00561(Glycerolipid metabolism)	K00002	EC:1.1.1.2	PREDICTED: aldo-keto reductase family 4 member C9 [Cucumis sativus]	NA	8.49907	6.97678	8.16215	16.6924	12.431	11.4096	5.74862	5.65494	4.64537	1.72223e-06	5.20779e-06	yes
bHLH	CsaV3_1G028780	CsaV3_1G028780	1870	CsaV3_1G028780.1	GO:0046983(protein dimerization activity)	04075(Plant hormone signal transduction)	K16189	NA	PREDICTED: transcription factor bHLH82 [Cucumis sativus]	NA	87.429	99.8381	94.6791	89.4511	73.1804	69.5794	21.3522	19.426	22.4632	4.91503e-20	1.05783e-18	yes
bHLH	CsaV3_2G008770	CsaV3_2G008770	4230	CsaV3_2G008770.1	GO:0046983(protein dimerization activity)	NA	NA	NA	PREDICTED: transcription factor bHLH35-like [Cucumis sativus]	NA	0.086601	0.446546	0.244524	0.197956	0.564032	0.047154	31.8039	14.7131	11.4957	2.54126e-28	1.11747e-26	yes
bHLH	CsaV3_3G039100	CsaV3_3G039100	10012	CsaV3_3G039100.1	GO:0046983(protein dimerization activity)	NA	NA	NA	PREDICTED: transcription factor bHLH48 [Cucumis sativus]	NA	0.579936	0.581708	0.444216	0.641351	1.36801	0.61353	1.37057	1.64719	1.98669	0.000315101	0.000871134	yes
bHLH	CsaV3_4G002800	CsaV3_4G002800	11393	CsaV3_4G002800.1	GO:0046983(protein dimerization activity)	NA	NA	NA	PREDICTED: transcription factor bHLH113-like [Cucumis sativus]	NA	6.44333	7.07137	4.87849	10.6361	16.4322	6.96828	12.384	28.3796	22.3229	4.80629e-05	0.00015834	yes
bHLH	CsaV3_4G003860	CsaV3_4G003860	11499	CsaV3_4G003860.1	GO:0046983(protein dimerization activity)	NA	NA	NA	PREDICTED: transcription factor bHLH128 [Cucumis sativus]	NA	72.8398	47.9054	52.3768	76.582	76.7275	45.03	13.1039	25.6463	29.5537	5.22531e-06	2.0548e-05	yes
bHLH	CsaV3_6G018830	CsaV3_6G018830	18716	CsaV3_6G018830.1	GO:0046983(protein dimerization activity)	NA	NA	NA	PREDICTED: transcription factor bHLH30-like isoform X1 [Cucumis sativus]	NA	0.124221	0.238269	0.249804	0.164938	0.246062	0.351695	0.551532	2.59936	2.8902	1.10472e-09	7.43496e-09	yes
bHLH	CsaV3_7G026520	CsaV3_7G026520	22629	CsaV3_7G026520.1	GO:0046983(protein dimerization activity)	NA	NA	NA	PREDICTED: transcription factor bHLH62 isoform X1 [Cucumis sativus]	NA	1.20764	0.829618	0.883735	1.30278	1.37702	0.832654	2.43288	2.05294	2.30576	0.00125465	0.00303641	yes
bHLH	CsaV3_7G027460	CsaV3_7G027460	22723	CsaV3_7G027460.1	GO:0046983(protein dimerization activity)	NA	NA	NA	PREDICTED: transcription factor bHLH155 isoform X1 [Cucumis sativus]	NA	5.31323	4.5113	5.52211	8.03059	8.9907	6.58345	12.1453	13.1654	13.7801	8.83402e-07	3.9452e-06	yes
ERF	CsaV3_1G012490	CsaV3_1G012490	1249	CsaV3_1G012490.1	GO:0003677(DNA binding);GO:0003700(DNA-binding transcription factor activity);GO:0005667(transcription factor complex);GO:0006355(regulation of transcription, DNA-templated)	NA	NA	NA	PREDICTED: ethylene-responsive transcription factor 12 [Cucumis sativus]	NA	0.42789	0.564916	0.152332	1.39504	1.41129	0.928296	8.5716	4.22668	5.00906	6.80875e-15	8.45986e-14	yes
ERF	CsaV3_3G021840	CsaV3_3G021840	8592	CsaV3_3G021840.1	GO:0003677(DNA binding);GO:0003700(DNA-binding transcription factor activity);GO:0005667(transcription factor complex);GO:0006355(regulation of transcription, DNA-templated)	04626(Plant-pathogen interaction)	K13434	NA	PREDICTED: ethylene-responsive transcription factor CRF4 [Cucumis sativus]	NA	2.46511	1.68095	2.12052	2.54694	2.09707	3.44422	0.809826	0.977871	0.67823	4.24991e-06	1.69394e-05	yes
ERF	CsaV3_3G030950	CsaV3_3G030950	9197	CsaV3_3G030950.1	GO:0003677(DNA binding);GO:0003700(DNA-binding transcription factor activity);GO:0005667(transcription factor complex);GO:0006355(regulation of transcription, DNA-templated)	NA	NA	NA	PREDICTED: ethylene-responsive transcription factor RAP2-12 [Cucumis sativus]	NA	44.3403	35.2803	39.8364	31.3992	46.2585	29.8453	46.3224	59.3793	64.0155	0.0253635	0.0433368	yes
ERF	CsaV3_4G028360	CsaV3_4G028360	12923	CsaV3_4G028360.1	GO:0003677(DNA binding);GO:0003700(DNA-binding transcription factor activity);GO:0005667(transcription factor complex);GO:0006355(regulation of transcription, DNA-templated)	NA	NA	NA	PREDICTED: ethylene-responsive transcription factor ERF014-like [Cucumis sativus]	NA	0.195742	0.322729	0.815703	1.13141	1.04721	0.774299	0.067443	0	0	3.97488e-08	2.1637e-07	yes
ERF	CsaV3_4G034640	CsaV3_4G034640	13551	CsaV3_4G034640.1	GO:0003677(DNA binding);GO:0003700(DNA-binding transcription factor activity);GO:0005667(transcription factor complex);GO:0006355(regulation of transcription, DNA-templated)	NA	NA	NA	PREDICTED: ethylene-responsive transcription factor ERF011-like [Cucumis sativus]	NA	17.2056	26.8182	25.026	15.43	8.61033	12.0231	5.73963	3.42661	4.03105	6.87041e-13	6.78474e-12	yes
ERF	CsaV3_5G000710	CsaV3_5G000710	13961	CsaV3_5G000710.1	GO:0003677(DNA binding);GO:0003700(DNA-binding transcription factor activity);GO:0005667(transcription factor complex);GO:0006355(regulation of transcription, DNA-templated)	04626(Plant-pathogen interaction)	K13434	NA	PREDICTED: ethylene-responsive transcription factor CRF2-like [Cucumis sativus]	NA	0.491659	0.961478	0.493974	0.439005	0.362264	0.751401	0.261479	0.227478	0.110265	0.0134358	0.0248488	yes
ERF	CsaV3_6G042110	CsaV3_6G042110	19955	CsaV3_6G042110.1	GO:0003677(DNA binding);GO:0003700(DNA-binding transcription factor activity);GO:0005667(transcription factor complex);GO:0006355(regulation of transcription, DNA-templated)	03040(Spliceosome)	K12900	NA	PREDICTED: ethylene-responsive transcription factor ABR1 [Cucumis sativus]	NA	19.9701	44.9898	58.6857	54.3885	64.2608	60.5744	16.2205	20.2341	28.3752	8.64444e-05	0.000270112	yes
ERF	CsaV3_6G043390	CsaV3_6G043390	20083	CsaV3_6G043390.1	GO:0003677(DNA binding);GO:0003700(DNA-binding transcription factor activity);GO:0005667(transcription factor complex);GO:0006355(regulation of transcription, DNA-templated)	NA	NA	NA	PREDICTED: AP2-like ethylene-responsive transcription factor TOE3 [Cucumis sativus]	NA	14.2033	11.4061	8.55003	13.9561	32.9014	10.1609	22.0756	34.0259	36.851	0.000605858	0.00157714	yes
ERF	CsaV3_6G044340	CsaV3_6G044340	20178	CsaV3_6G044340.1	GO:0003677(DNA binding);GO:0003700(DNA-binding transcription factor activity);GO:0005667(transcription factor complex);GO:0006355(regulation of transcription, DNA-templated)	NA	NA	NA	PREDICTED: AP2-like ethylene-responsive transcription factor ANT isoform X2 [Cucumis sativus]	NA	0.39283	0.315983	0.426066	0.637943	0.658034	0.883319	0.716772	1.02967	1.27115	0.00180587	0.00420932	yes
EIN	CsaV3_1G042150	CsaV3_1G042150	3099	CsaV3_1G042150.1	GO:0003700(DNA-binding transcription factor activity);GO:0005634(nucleus);GO:0005667(transcription factor complex);GO:0006355(regulation of transcription, DNA-templated)	04016(MAPK signaling pathway - plant);04075(Plant hormone signal transduction)	K14514	NA	PREDICTED: protein ETHYLENE INSENSITIVE 3 [Cucumis sativus]	NA	212.593	194.955	182.9	277.197	330.134	272.762	821.734	584.7	586.199	1.69429e-11	1.44564e-10	yes
MYB	CsaV3_3G002560	CsaV3_3G002560	6664	CsaV3_3G002560.1	GO:0003677(DNA binding)	NA	NA	NA	PREDICTED: transcription factor MYB1R1 [Cucumis sativus]	NA	240.321	202.21	169.924	276.809	330.044	241.419	415.959	359.626	379.489	0.00172205	0.00403381	yes
MYB	CsaV3_4G034750	CsaV3_4G034750	13561	CsaV3_4G034750.1	GO:0003677(DNA binding)	NA	NA	NA	PREDICTED: transcription factor MYB44-like [Cucumis sativus]	NA	3.05364	1.98878	2.29421	3.75454	2.84639	2.32651	23.162	23.4492	32.1011	4.60553e-32	2.82461e-30	yes
MAPK	CsaV3_4G007970	CsaV3_4G007970	11910	CsaV3_4G007970.1	GO:0004707(MAP kinase activity);GO:0005524(ATP binding);GO:0006468(protein phosphorylation);GO:0007178(transmembrane receptor protein serine/threonine kinase signaling pathway);GO:0009069(serine family amino acid metabolic process)	04016(MAPK signaling pathway - plant)	K20538	EC:2.7.11.24	PREDICTED: mitogen-activated protein kinase 19 isoform X1 [Cucumis sativus]	NA	32.3958	21.794	22.9681	24.2624	16.7964	17.4959	41.8794	36.4434	37.3541	0.000630877	0.00163471	yes
MAPK	CsaV3_5G004750	CsaV3_5G004750	14365	CsaV3_5G004750.1	GO:0004672(protein kinase activity);GO:0005524(ATP binding);GO:0006468(protein phosphorylation)	04016(MAPK signaling pathway - plant)	K20717	EC:2.7.11.25	PREDICTED: mitogen-activated protein kinase kinase kinase YODA-like [Cucumis sativus]	NA	10.5777	9.86909	11.0529	11.5729	12.9979	14.4619	16.3009	18.5143	18.7482	0.00476668	0.0100133	yes
MAPK	CsaV3_6G005430	CsaV3_6G005430	17673	CsaV3_6G005430.1	GO:0004707(MAP kinase activity);GO:0005524(ATP binding);GO:0006468(protein phosphorylation);GO:0007178(transmembrane receptor protein serine/threonine kinase signaling pathway);GO:0009069(serine family amino acid metabolic process)	04016(MAPK signaling pathway - plant)	K20538	EC:2.7.11.24	PREDICTED: mitogen-activated protein kinase 15 isoform X2 [Cucumis sativus]	NA	20.2522	23.7136	25.9633	29.1019	32.0305	31.138	43.8961	41.1245	47.455	0.000318659	0.000880076	yes
MAPK	CsaV3_6G032360	CsaV3_6G032360	19178	CsaV3_6G032360.1	GO:0004707(MAP kinase activity);GO:0005524(ATP binding);GO:0006468(protein phosphorylation);GO:0007178(transmembrane receptor protein serine/threonine kinase signaling pathway);GO:0009069(serine family amino acid metabolic process)	04016(MAPK signaling pathway - plant);04075(Plant hormone signal transduction)	K14512	EC:2.7.11.24	PREDICTED: mitogen-activated protein kinase homolog MMK1 [Cucumis sativus]	NA	11.9882	9.62489	11.0019	7.55065	7.53045	8.20378	14.3618	14.1721	16.1127	0.00129678	0.00312862	yes
MAPK	CsaV3_6G043080	CsaV3_6G043080	20052	CsaV3_6G043080.1	GO:0004672(protein kinase activity);GO:0005524(ATP binding);GO:0006468(protein phosphorylation)	NA	NA	NA	PREDICTED: mitogen-activated protein kinase kinase kinase YODA isoform X2 [Cucumis sativus]	NA	4.04725	5.40519	5.73045	1.49618	1.35481	2.47916	1.31662	3.0529	3.25675	0.00012034	0.000365455	yes
MAPK	CsaV3_6G043320	CsaV3_6G043320	20076	CsaV3_6G043320.1	GO:0004672(protein kinase activity);GO:0005524(ATP binding);GO:0006468(protein phosphorylation)	04016(MAPK signaling pathway - plant)	K20716	NA	PREDICTED: mitogen-activated protein kinase kinase kinase 3-like [Cucumis sativus]	NA	14.3995	13.8655	13.484	20.0275	20.9669	13.2626	2.55204	1.18681	0.940306	1.91568e-19	3.86788e-18	yes
ARF	CsaV3_2G001050	CsaV3_2G001050	3566	CsaV3_2G001050.1	GO:0003677(DNA binding);GO:0005634(nucleus);GO:0006355(regulation of transcription, DNA-templated);GO:0009725(response to hormone)	04075(Plant hormone signal transduction)	K14486	NA	PREDICTED: auxin response factor 19 isoform X1 [Cucumis sativus]	NA	5.22822	4.59258	7.4112	4.46244	5.62827	4.52736	9.97945	10.4439	10.6366	0.000127273	0.000384434	yes
ARF	CsaV3_6G039630	CsaV3_6G039630	19707	CsaV3_6G039630.1	GO:0003677(DNA binding);GO:0005515(protein binding);GO:0005634(nucleus);GO:0006355(regulation of transcription, DNA-templated);GO:0009725(response to hormone)	04075(Plant hormone signal transduction)	K14486	NA	PREDICTED: auxin response factor 18 [Cucumis sativus]	NA	17.1904	14.7058	13.4709	10.9476	15.3183	13.1029	25.7427	26.281	24.2551	0.000141644	0.000424229	yes
ARF	CsaV3_6G052060	CsaV3_6G052060	20950	CsaV3_6G052060.1	GO:0003677(DNA binding);GO:0005515(protein binding);GO:0005634(nucleus);GO:0006355(regulation of transcription, DNA-templated);GO:0009725(response to hormone)	04075(Plant hormone signal transduction)	K14486	NA	PREDICTED: auxin response factor 6 isoform X2 [Cucumis sativus]	NA	187.594	122.68	137.301	190.541	206.161	101.147	542.301	488.23	539.924	1.97371e-11	1.66318e-10	yes
