# Supplementary material for: Comparative transcriptome analysis of cucumber fruit tissues reveals novel regulatory genes in ascorbic acid biosynthesis
Source: PeerJ journal article supplement (doi:10.7717/peerj.18327), 2024-10-25
Supplement: Supplementary_Table_7.xlsx [file Supplementary_Table_7.xlsx]

## Sheet: Table S7 DEGs in H28
Supplemental Table S7 DEGs in H28.
gene	gene_id	gene_name	EntrezID	transcript_id	GO	KEGG	KO_ENTRY	EC	Description	trans_type	FPKM.A1_1	FPKM.A1_2	FPKM.A1_3	FPKM.A2_1	FPKM.A2_2	FPKM.A2_3	FPKM.A3_1	FPKM.A3_2	FPKM.A3_3	pval	qval	significant
PMI	CsaV3_5G004970	CsaV3_5G004970	14387	CsaV3_5G004970.1	GO:0004476(mannose-6-phosphate isomerase activity);GO:0006000(fructose metabolic process);GO:0006013(mannose metabolic process);GO:0008270(zinc ion binding);GO:0009298(GDP-mannose biosynthetic process)	00051(Fructose and mannose metabolism);00520(Amino sugar and nucleotide sugar metabolism)	K01809	EC:5.3.1.8	PREDICTED: mannose-6-phosphate isomerase 1 [Cucumis sativus]	NA	23.4133	23.8006	37.4867	17.4371	16.5162	21.335	7.14203	10.7945	11.0853	1.12815e-06	4.94481e-06	yes
PMM	CsaV3_5G014110	CsaV3_5G014110		CsaV3_5G014110.1	GO:0004615(phosphomannomutase activity);GO:0005737(cytoplasm);GO:0006000(fructose metabolic process);GO:0006013(mannose metabolic process);GO:0009298(GDP-mannose biosynthetic process)	00051(Fructose and mannose metabolism);00520(Amino sugar and nucleotide sugar metabolism)	K17497	EC:5.4.2.8	PREDICTED: phosphomannomutase [Cucumis sativus]	NA	3.67408	3.21255	3.52375	2.17591	1.55838	1.09621	2.19864	3.02806	3.83164	0.00175348	0.00325268	yes
GME	CsaV3_2G004170	CsaV3_2G004170		CsaV3_2G004170.1	GO:0003824(catalytic activity);GO:0050662(coenzyme binding)	00053(Ascorbate and aldarate metabolism);00520(Amino sugar and nucleotide sugar metabolism)	K10046	EC:5.1.3.18;EC:5.1.3.-	PREDICTED: GDP-mannose 3,5-epimerase 1 [Cucumis sativus]	NA	15.5015	14.7673	16.8862	9.9139	8.99689	5.66538	8.40973	10.1469	13.4551	0.000877856	0.0017203	yes
GGP	CsaV3_7G022020	CsaV3_7G022020		CsaV3_7G022020.1	GO:0080048(GDP-D-glucose phosphorylase activity)	00053(Ascorbate and aldarate metabolism)	K14190	EC:2.7.7.69	PREDICTED: GDP-L-galactose phosphorylase 1 [Cucumis sativus]	NA	161.467	138.14	165.805	92.6473	111.188	154.464	66.9304	60.9766	59.2656	8.1478e-08	2.93848e-07	yes
GPP	CsaV3_1G017100	CsaV3_1G017100	1602	CsaV3_1G017100.1	GO:0046854(phosphatidylinositol phosphorylation)	00053(Ascorbate and aldarate metabolism);00562(Inositol phosphate metabolism);04070(Phosphatidylinositol signaling system)	K10047	EC:3.1.3.25;EC:3.1.3.93	PREDICTED: inositol monophosphatase [Cucumis sativus]	NA	8.50361	12.473	7.38549	19.4668	25.3352	30.1026	18.5732	23.1265	22.1847	6.70951e-06	2.58341e-05	yes
GPP	CsaV3_2G015040	CsaV3_2G015040	4848	CsaV3_2G015040.1	GO:0004401(histidinol-phosphatase activity);GO:0006547(histidine metabolic process);GO:0046854(phosphatidylinositol phosphorylation)	00053(Ascorbate and aldarate metabolism);00562(Inositol phosphate metabolism);00340(Histidine metabolism);04070(Phosphatidylinositol signaling system)	K18649	EC:3.1.3.25;EC:3.1.3.93	PREDICTED: bifunctional phosphatase IMPL2, chloroplastic [Cucumis sativus]	NA	1.60309	1.43291	1.62043	1.73198	1.52199	0.80305	2.18949	3.22185	3.23042	0.00548537	0.0113262	yes
APX	CsaV3_7G000930	CsaV3_7G000930	21159	CsaV3_7G000930.1	GO:0004601(peroxidase activity);GO:0006979(response to oxidative stress);GO:0020037(heme binding);GO:0055114(oxidation-reduction process)	00053(Ascorbate and aldarate metabolism);00480(Glutathione metabolism)	K00434	EC:1.11.1.11	PREDICTED: L-ascorbate peroxidase 3, peroxisomal [Cucumis sativus]	NA	34.4331	26.7487	39.2593	13.0955	14.7053	8.14304	45.7751	61.9338	64.1244	4.12953e-13	4.17664e-12	yes
APX	CsaV3_2G032090	CsaV3_2G032090	5950	CsaV3_2G032090.1	GO:0004601(peroxidase activity);GO:0006979(response to oxidative stress);GO:0020037(heme binding);GO:0055114(oxidation-reduction process)	00053(Ascorbate and aldarate metabolism);00480(Glutathione metabolism)	K00434	EC:1.11.1.11	PREDICTED: putative L-ascorbate peroxidase 6 isoform X1 [Cucumis sativus]	NA	0.853852	0.635653	0.243939	0.749035	1.01371	0.976991	5.37512	2.92221	3.04287	1.0256e-08	6.09756e-08	yes
APX	CsaV3_6G047320	CsaV3_6G047320	20476	CsaV3_6G047320.1	GO:0004601(peroxidase activity);GO:0006979(response to oxidative stress);GO:0020037(heme binding);GO:0055114(oxidation-reduction process)	00053(Ascorbate and aldarate metabolism);00480(Glutathione metabolism)	K00434	EC:1.11.1.11	PREDICTED: probable L-ascorbate peroxidase 3 [Cucumis sativus]	NA	6.7483	5.79048	5.63371	12.9394	6.65656	9.72988	2.95693	2.8637	2.15845	5.34447e-08	2.86337e-07	yes
APX	CsaV3_1G033510	CsaV3_1G033510	2343	CsaV3_1G033510.1	GO:0004601(peroxidase activity);GO:0006979(response to oxidative stress);GO:0020037(heme binding);GO:0055114(oxidation-reduction process)	00053(Ascorbate and aldarate metabolism);00480(Glutathione metabolism)	K00434	EC:1.11.1.11	L-ascorbate peroxidase, cytosolic-like [Cucumis sativus]	NA	397.209	404.211	502.167	275.187	249.127	261.398	507.366	526.296	498.06	0.000202917	0.000586636	yes
AAO	CsaV3_6G045670	CsaV3_6G045670	20311	CsaV3_6G045670.1	GO:0005507(copper ion binding);GO:0005576(extracellular region);GO:0016491(oxidoreductase activity);GO:0055114(oxidation-reduction process)	00053(Ascorbate and aldarate metabolism)	K00423	EC:1.10.3.3	PREDICTED: L-ascorbate oxidase [Cucumis sativus]	NA	23.5285	31.7642	17.0613	48.2699	20.394	31.4666	1.8981	3.32573	0.707623	2.38558e-16	3.49044e-15	yes
AAO	CsaV3_7G003530	CsaV3_7G003530	21419	CsaV3_7G003530.1	GO:0005507(copper ion binding);GO:0016491(oxidoreductase activity);GO:0055114(oxidation-reduction process)	NA	NA	NA	PREDICTED: L-ascorbate oxidase homolog [Cucumis sativus]	NA	22.4615	33.3301	32.4502	25.4585	13.2626	18.2849	1.06301	3.95472	3.10839	1.05115e-15	1.43381e-14	yes
AAO	CsaV3_7G001430	CsaV3_7G001430	21209	CsaV3_7G001430.1	GO:0005507(copper ion binding);GO:0016491(oxidoreductase activity);GO:0055114(oxidation-reduction process)	NA	NA	NA	PREDICTED: L-ascorbate oxidase homolog [Cucumis sativus]	NA	11.2908	19.6531	13.2759	37.6399	23.2573	40.3079	9.5671	5.51399	4.24477	1.72158e-11	1.46816e-10	yes
AAO	CsaV3_6G043000	CsaV3_6G043000	20044	CsaV3_6G043000.1	GO:0005507(copper ion binding);GO:0016491(oxidoreductase activity);GO:0055114(oxidation-reduction process)	NA	NA	NA	PREDICTED: L-ascorbate oxidase homolog [Cucumis sativus]	NA	2.44549	4.26586	3.0703	10.3467	7.85921	8.7743	2.72595	4.47117	3.86359	4.92401e-07	2.29253e-06	yes
AAO	CsaV3_1G042210	CsaV3_1G042210	3105	CsaV3_1G042210.1	GO:0005507(copper ion binding);GO:0005576(extracellular region);GO:0016491(oxidoreductase activity);GO:0055114(oxidation-reduction process)	00053(Ascorbate and aldarate metabolism)	K00423	EC:1.10.3.3	PREDICTED: L-ascorbate oxidase [Cucumis sativus]	NA	36.1037	45.6556	42.134	49.0611	23.5262	33.6558	16.1932	19.2149	17.8206	2.29747e-05	8.03795e-05	yes
MDHAR	CsaV3_3G005990	CsaV3_3G005990	7007	CsaV3_3G005990.1	GO:0016491(oxidoreductase activity);GO:0050660(flavin adenine dinucleotide binding);GO:0055114(oxidation-reduction process)	00053(Ascorbate and aldarate metabolism)	K08232	EC:1.6.5.4	PREDICTED: monodehydroascorbate reductase-like [Cucumis sativus]	NA	8.26855	6.93138	8.8949	15.6416	8.69384	12.2718	5.94896	3.72171	3.24109	1.8945e-05	6.72912e-05	yes
DHAR	CsaV3_5G006680	CsaV3_5G006680	14558	CsaV3_5G006680.1	GO:0005515(protein binding)	00053(Ascorbate and aldarate metabolism);00480(Glutathione metabolism)	K21888	EC:1.8.5.1;EC:2.5.1.18	PREDICTED: glutathione S-transferase DHAR2 [Cucumis sativus]	NA	45.4378	43.5828	46.0525	21.6593	20.2306	24.0064	76.4891	87.3285	78.879	1.18431e-14	1.44078e-13	yes
UGDH	CsaV3_1G002780	CsaV3_1G002780	279	CsaV3_1G002780.1	NA	00040(Pentose and glucuronate interconversions);00053(Ascorbate and aldarate metabolism);00520(Amino sugar and nucleotide sugar metabolism)	K00012	EC:1.1.1.22	PREDICTED: UDP-glucose 6-dehydrogenase 1 [Cucumis sativus]	NA	7.45249	14.8067	10.3334	41.7615	23.1224	26.0713	2.33813	3.20586	2.89826	3.63362e-25	1.22477e-23	yes
UGDH	CsaV3_6G033570	CsaV3_6G033570	19200	CsaV3_6G033570.1	GO:0000271(polysaccharide biosynthetic process);GO:0003979(UDP-glucose 6-dehydrogenase activity);GO:0005982(starch metabolic process);GO:0005985(sucrose metabolic process);GO:0009117(nucleotide metabolic process);GO:0051287(NAD binding);GO:0055114(oxidation-reduction process)	00040(Pentose and glucuronate interconversions);00053(Ascorbate and aldarate metabolism);00520(Amino sugar and nucleotide sugar metabolism)	K00012	EC:1.1.1.22	PREDICTED: UDP-glucose 6-dehydrogenase 1 [Cucumis sativus]	NA	1.52478	0.440532	0.889983	0.285774	0.154469	0.114002	0.692894	1.48413	1.4371	1.25966e-05	4.6149e-05	yes
UGDH	CsaV3_4G008770	CsaV3_4G008770	11990	CsaV3_4G008770.1	GO:0003979(UDP-glucose 6-dehydrogenase activity);GO:0005982(starch metabolic process);GO:0005985(sucrose metabolic process);GO:0009117(nucleotide metabolic process);GO:0051287(NAD binding);GO:0055114(oxidation-reduction process)	00040(Pentose and glucuronate interconversions);00053(Ascorbate and aldarate metabolism);00520(Amino sugar and nucleotide sugar metabolism)	K00012	EC:1.1.1.22	PREDICTED: UDP-glucose 6-dehydrogenase 1 [Cucumis sativus]	NA	108.878	136.26	121.807	216.674	176.764	194.713	70.5492	124.142	99.3296	0.000207354	0.00059798	yes
GAE	CsaV3_2G011740	CsaV3_2G011740	4518	CsaV3_2G011740.1	GO:0005975(carbohydrate metabolic process);GO:0016857(racemase and epimerase activity, acting on carbohydrates and derivatives);GO:0050662(coenzyme binding)	00520(Amino sugar and nucleotide sugar metabolism)	K08679	EC:5.1.3.6	PREDICTED: UDP-glucuronate 4-epimerase 6 [Cucumis sativus]	NA	9.143	8.19393	6.84197	7.36147	7.49606	7.8146	22.6555	27.7194	23.7229	7.40006e-14	8.20698e-13	yes
GAE	CsaV3_3G009770	CsaV3_3G009770	7385	CsaV3_3G009770.1	GO:0005975(carbohydrate metabolic process);GO:0016857(racemase and epimerase activity, acting on carbohydrates and derivatives);GO:0050662(coenzyme binding)	00520(Amino sugar and nucleotide sugar metabolism)	K08679	EC:5.1.3.6	PREDICTED: UDP-glucuronate 4-epimerase 3 [Cucumis sativus]	NA	1.35204	2.16867	1.2026	2.48896	2.79312	3.40888	2.53286	5.40983	4.65502	0.00057556	0.001505	yes
GAE	CsaV3_1G029310	CsaV3_1G029310	1923	CsaV3_1G029310.1	GO:0005975(carbohydrate metabolic process);GO:0016857(racemase and epimerase activity, acting on carbohydrates and derivatives);GO:0050662(coenzyme binding)	00520(Amino sugar and nucleotide sugar metabolism)	K08679	EC:5.1.3.6	PREDICTED: UDP-glucuronate 4-epimerase 1-like [Cucumis sativus]	NA	1.06168	2.84829	1.97428	2.71183	2.12968	1.9756	0.34871	0.642882	1.36623	0.00455911	0.0096361	yes
GAE	CsaV3_3G003130	CsaV3_3G003130	6721	CsaV3_3G003130.1	GO:0005975(carbohydrate metabolic process);GO:0016857(racemase and epimerase activity, acting on carbohydrates and derivatives);GO:0050662(coenzyme binding)	00520(Amino sugar and nucleotide sugar metabolism)	K08679	EC:5.1.3.6	PREDICTED: UDP-glucuronate 4-epimerase 3 [Cucumis sativus]	NA	8.40314	8.27354	9.99719	6.163	4.50312	5.03574	5.84617	5.44667	6.10158	0.0136105	0.0251353	yes
MIOX	CsaV3_3G023420	CsaV3_3G023420	8750	CsaV3_3G023420.1	GO:0005506(iron ion binding);GO:0005737(cytoplasm);GO:0016788(hydrolase activity, acting on ester bonds);GO:0019310(inositol catabolic process);GO:0050113(inositol oxygenase activity);GO:0055114(oxidation-reduction process)	00053(Ascorbate and aldarate metabolism);00562(Inositol phosphate metabolism)	K00469	EC:1.13.99.1	PREDICTED: GDSL esterase/lipase APG-like [Cucumis sativus]	NA	4.71075	2.75973	11.1099	0.266628	0.324526	0.441262	0.904159	3.38863	2.04621	9.65277e-13	9.37911e-12	yes
MIOX	CsaV3_2G001660	CsaV3_2G001660	3627	CsaV3_2G001660.1	GO:0005506(iron ion binding);GO:0005737(cytoplasm);GO:0019310(inositol catabolic process);GO:0050113(inositol oxygenase activity);GO:0055114(oxidation-reduction process)	00053(Ascorbate and aldarate metabolism);00562(Inositol phosphate metabolism)	K00469	EC:1.13.99.1	PREDICTED: inositol oxygenase 2 [Cucumis melo]	NA	2.25444	2.4817	2.14408	2.70199	2.14101	2.9004	0.759556	1.34148	0.618156	0.00013475	0.000404771	yes
MIOX	CsaV3_1G040000	CsaV3_1G040000	2884	CsaV3_1G040000.1	GO:0005506(iron ion binding);GO:0005737(cytoplasm);GO:0019310(inositol catabolic process);GO:0050113(inositol oxygenase activity);GO:0055114(oxidation-reduction process)	00053(Ascorbate and aldarate metabolism);00562(Inositol phosphate metabolism)	K00469	EC:1.13.99.1	PREDICTED: inositol oxygenase 2 [Cucumis sativus]	NA	25.1009	46.5501	31.5652	102.217	70.6817	466.624	162.806	36.3196	26.6291	0.000182289	0.000533523	yes
UDPase	CsaV3_6G034020	CsaV3_6G034020	19245	CsaV3_6G034020.1	GO:0008152(metabolic process);GO:0070569(uridylyltransferase activity)	00040(Pentose and glucuronate interconversions);00052(Galactose metabolism);00053(Ascorbate and aldarate metabolism);00520(Amino sugar and nucleotide sugar metabolism)	K12447	EC:2.7.7.64	PREDICTED: UDP-sugar pyrophosphorylase [Cucumis sativus]	NA	16.5043	17.7655	11.9478	30.7858	37.135	32.2804	57.4644	50.504	44.8382	1.82358e-10	1.36593e-09	yes
UGTs	CsaV3_1G009900	CsaV3_1G009900	990	CsaV3_1G009900.1	GO:0046983(protein dimerization activity)	00040(Pentose and glucuronate interconversions);00053(Ascorbate and aldarate metabolism);00520(Amino sugar and nucleotide sugar metabolism)	K16190	EC:2.7.1.43	PREDICTED: transcription factor ICE1-like isoform X1 [Cucumis sativus]	NA	6.50995	5.69615	7.52311	7.95296	12.8946	7.89924	17.9369	18.5353	20.5003	1.94536e-07	9.62592e-07	yes
UGTs	CsaV3_3G027730	CsaV3_3G027730	8974	CsaV3_3G027730.1	GO:0046983(protein dimerization activity)	00040(Pentose and glucuronate interconversions);00053(Ascorbate and aldarate metabolism);00520(Amino sugar and nucleotide sugar metabolism)	K16190	EC:2.7.1.43	PREDICTED: transcription factor ICE1 [Cucumis sativus]	NA	3.7874	3.93745	3.58478	3.30678	2.04626	4.60917	1.37081	0.967193	1.28123	9.68936e-07	4.29311e-06	yes
UGTs	CsaV3_3G046060	CsaV3_3G046060	10708	CsaV3_3G046060.1	NA	00040(Pentose and glucuronate interconversions);00053(Ascorbate and aldarate metabolism);00520(Amino sugar and nucleotide sugar metabolism)	K16190	EC:2.7.1.43	PREDICTED: protein Simiate [Cucumis sativus]	NA	8.03392	6.26167	6.35684	9.16674	15.0367	7.67012	14.1406	16.2965	15.5958	0.000760262	0.00193765	yes
AKRs	CsaV3_4G025330	CsaV3_4G025330	12638	CsaV3_4G025330.1	GO:0016491(oxidoreductase activity);GO:0055114(oxidation-reduction process)	00010(Glycolysis / Gluconeogenesis);00040(Pentose and glucuronate interconversions);00561(Glycerolipid metabolism)	K00002	EC:1.1.1.2	PREDICTED: aldo-keto reductase family 4 member C9 [Cucumis sativus]	NA	8.10435	10.1767	6.5188	18.9604	13.6931	29.8566	2.86838	2.70609	1.95737	3.41288e-16	4.90121e-15	yes
bHLH	CsaV3_1G028780	CsaV3_1G028780	1870	CsaV3_1G028780.1	GO:0046983(protein dimerization activity)	04075(Plant hormone signal transduction);04712(Circadian rhythm - plant)	K12126	NA	PREDICTED: transcription factor bHLH122-like isoform X1 [Cucumis sativus]	NA	0.219827	0.040813	0.063548	0.451258	0.197454	0.26768	11.7775	15.247	20.8425	1.6233e-67	1.8764e-65	yes
bHLH	CsaV3_2G008770	CsaV3_2G008770	4230	CsaV3_2G008770.1	GO:0046983(protein dimerization activity)	NA	NA	NA	PREDICTED: transcription factor bHLH68 [Cucumis sativus]	NA	65.6813	63.4287	55.3138	74.3522	87.9127	101.833	14.1899	15.0329	11.9326	6.90622e-32	1.78122e-30	yes
bHLH	CsaV3_3G039100	CsaV3_3G039100	10012	CsaV3_3G039100.1	GO:0046983(protein dimerization activity)	NA	NA	NA	PREDICTED: transcription factor bHLH49-like [Cucumis melo]	NA	38.7781	26.2621	29.6593	104.256	113.191	88.4216	12.1021	10.6779	19.281	3.76548e-28	7.72411e-27	yes
bHLH	CsaV3_4G002800	CsaV3_4G002800	11393	CsaV3_4G002800.1	GO:0046983(protein dimerization activity)	04016(MAPK signaling pathway - plant);04075(Plant hormone signal transduction)	K13422	NA	PREDICTED: transcription factor bHLH30-like [Cucumis sativus]	NA	5.73016	5.48607	2.87412	14.661	18.1106	9.17435	12.719	16.5439	16.1088	1.53711e-06	4.68469e-06	yes
bHLH	CsaV3_4G003860	CsaV3_4G003860	11499	CsaV3_4G003860.1	GO:0003677(DNA binding);GO:0006357(regulation of transcription by RNA polymerase II);GO:0046983(protein dimerization activity)	NA	NA	NA	PREDICTED: transcription factor bHLH118-like [Cucumis sativus]	NA	2.28846	3.01569	2.81428	1.67892	1.79299	1.082	1.24365	1.80422	1.25298	0.00226361	0.0041099	yes
bHLH	CsaV3_6G018830	CsaV3_6G018830	18716	CsaV3_6G018830.1	GO:0046983(protein dimerization activity)	NA	NA	NA	PREDICTED: transcription factor bHLH49-like [Cucumis sativus]	NA	0.718677	0.641069	0.665969	1.61442	1.22831	0.57417	1.41258	1.38364	1.8618	0.00684027	0.0113131	yes
bHLH	CsaV3_7G026520	CsaV3_7G026520	22629	CsaV3_7G026520.1	GO:0046983(protein dimerization activity)	NA	NA	NA	PREDICTED: transcription factor bHLH30-like isoform X1 [Cucumis sativus]	NA	0.245238	0.365669	0.231029	0.378124	0.555724	0.477337	0.464057	0.788978	1.33366	0.00847728	0.0137379	yes
bHLH	CsaV3_7G027460	CsaV3_7G027460	22723	CsaV3_7G027460.1	NA	NA	NA	NA	PREDICTED: transcription factor bHLH68-like isoform X2 [Cucumis sativus]	NA	11.0239	7.22129	7.49275	12.7011	11.2806	8.84481	14.089	12.7122	12.9629	0.0341101	0.0485151	yes
ERF	CsaV3_1G012490	CsaV3_1G012490	1249	CsaV3_1G012490.1	GO:0003677(DNA binding);GO:0003700(DNA-binding transcription factor activity);GO:0005667(transcription factor complex);GO:0006355(regulation of transcription, DNA-templated)	NA	NA	NA	PREDICTED: ethylene-responsive transcription factor 12 [Cucumis sativus]	NA	0.42789	0.564916	0.152332	1.39504	1.41129	0.928296	8.5716	4.22668	5.00906	6.80875e-15	8.45986e-14	yes
ERF	CsaV3_3G021840	CsaV3_3G021840	8592	CsaV3_3G021840.1	GO:0003677(DNA binding);GO:0003700(DNA-binding transcription factor activity);GO:0005667(transcription factor complex);GO:0006355(regulation of transcription, DNA-templated)	04626(Plant-pathogen interaction)	K13434	NA	PREDICTED: ethylene-responsive transcription factor CRF4 [Cucumis sativus]	NA	2.46511	1.68095	2.12052	2.54694	2.09707	3.44422	0.809826	0.977871	0.67823	4.24991e-06	1.69394e-05	yes
ERF	CsaV3_3G030950	CsaV3_3G030950	9197	CsaV3_3G030950.1	GO:0003677(DNA binding);GO:0003700(DNA-binding transcription factor activity);GO:0005667(transcription factor complex);GO:0006355(regulation of transcription, DNA-templated)	NA	NA	NA	PREDICTED: ethylene-responsive transcription factor RAP2-12 [Cucumis sativus]	NA	44.3403	35.2803	39.8364	31.3992	46.2585	29.8453	46.3224	59.3793	64.0155	0.0253635	0.0433368	yes
ERF	CsaV3_4G028360	CsaV3_4G028360	12923	CsaV3_4G028360.1	GO:0003677(DNA binding);GO:0003700(DNA-binding transcription factor activity);GO:0005667(transcription factor complex);GO:0006355(regulation of transcription, DNA-templated)	NA	NA	NA	PREDICTED: ethylene-responsive transcription factor ERF014-like [Cucumis sativus]	NA	0.195742	0.322729	0.815703	1.13141	1.04721	0.774299	0.067443	0	0	3.97488e-08	2.1637e-07	yes
ERF	CsaV3_4G034640	CsaV3_4G034640	13551	CsaV3_4G034640.1	GO:0003677(DNA binding);GO:0003700(DNA-binding transcription factor activity);GO:0005667(transcription factor complex);GO:0006355(regulation of transcription, DNA-templated)	NA	NA	NA	PREDICTED: ethylene-responsive transcription factor ERF011-like [Cucumis sativus]	NA	17.2056	26.8182	25.026	15.43	8.61033	12.0231	5.73963	3.42661	4.03105	6.87041e-13	6.78474e-12	yes
ERF	CsaV3_5G000710	CsaV3_5G000710	13961	CsaV3_5G000710.1	GO:0003677(DNA binding);GO:0003700(DNA-binding transcription factor activity);GO:0005667(transcription factor complex);GO:0006355(regulation of transcription, DNA-templated)	04626(Plant-pathogen interaction)	K13434	NA	PREDICTED: ethylene-responsive transcription factor CRF2-like [Cucumis sativus]	NA	0.491659	0.961478	0.493974	0.439005	0.362264	0.751401	0.261479	0.227478	0.110265	0.0134358	0.0248488	yes
ERF	CsaV3_6G042110	CsaV3_6G042110	19955	CsaV3_6G042110.1	GO:0003677(DNA binding);GO:0003700(DNA-binding transcription factor activity);GO:0005667(transcription factor complex);GO:0006355(regulation of transcription, DNA-templated)	03040(Spliceosome)	K12900	NA	PREDICTED: ethylene-responsive transcription factor ABR1 [Cucumis sativus]	NA	19.9701	44.9898	58.6857	54.3885	64.2608	60.5744	16.2205	20.2341	28.3752	8.64444e-05	0.000270112	yes
ERF	CsaV3_6G043390	CsaV3_6G043390	20083	CsaV3_6G043390.1	GO:0003677(DNA binding);GO:0003700(DNA-binding transcription factor activity);GO:0005667(transcription factor complex);GO:0006355(regulation of transcription, DNA-templated)	NA	NA	NA	PREDICTED: AP2-like ethylene-responsive transcription factor TOE3 [Cucumis sativus]	NA	14.2033	11.4061	8.55003	13.9561	32.9014	10.1609	22.0756	34.0259	36.851	0.000605858	0.00157714	yes
ERF	CsaV3_6G044340	CsaV3_6G044340	20178	CsaV3_6G044340.1	GO:0003677(DNA binding);GO:0003700(DNA-binding transcription factor activity);GO:0005667(transcription factor complex);GO:0006355(regulation of transcription, DNA-templated)	NA	NA	NA	PREDICTED: AP2-like ethylene-responsive transcription factor ANT isoform X2 [Cucumis sativus]	NA	0.39283	0.315983	0.426066	0.637943	0.658034	0.883319	0.716772	1.02967	1.27115	0.00180587	0.00420932	yes
EIN	CsaV3_1G042150	CsaV3_1G042150	3099	CsaV3_1G042150.1	GO:0003700(DNA-binding transcription factor activity);GO:0005634(nucleus);GO:0005667(transcription factor complex);GO:0006355(regulation of transcription, DNA-templated)	04016(MAPK signaling pathway - plant);04075(Plant hormone signal transduction)	K14514	NA	PREDICTED: protein ETHYLENE INSENSITIVE 3 [Cucumis sativus]	NA	137.962	134.727	145.85	310.487	285.78	221.915	809.453	849.273	759.8	4.14495e-30	9.5824e-29	yes
MYB	CsaV3_3G002560	CsaV3_3G002560	6664	CsaV3_3G002560.1	GO:0003677(DNA binding)	NA	NA	NA	PREDICTED: transcription factor MYB1R1 [Cucumis sativus]	NA	191.845	167.162	156.414	310.235	333.706	274.19	437.116	463.282	434.123	2.96179e-09	1.28361e-08	yes
MYB	CsaV3_4G034750	CsaV3_4G034750	13561	CsaV3_4G034750.1	GO:0003677(DNA binding)	NA	NA	NA	PREDICTED: transcription factor MYB44-like [Cucumis sativus]	NA	56.8769	42.0945	48.4738	28.1293	24.8653	15.8292	22.143	26.8384	34.4752	1.79239e-05	4.65469e-05	yes
MAPK	CsaV3_4G007970	CsaV3_4G007970	11910	CsaV3_4G007970.1	GO:0004707(MAP kinase activity);GO:0005524(ATP binding);GO:0006468(protein phosphorylation);GO:0007178(transmembrane receptor protein serine/threonine kinase signaling pathway);GO:0009069(serine family amino acid metabolic process)	04016(MAPK signaling pathway - plant)	K20538	EC:2.7.11.24	PREDICTED: mitogen-activated protein kinase 19 isoform X1 [Cucumis sativus]	NA	18.5672	12.2218	10.1209	22.5197	16.2797	19.6691	3.0065	0.820745	0.914633	6.81482e-16	5.79589e-15	yes
MAPK	CsaV3_5G004750	CsaV3_5G004750	14365	CsaV3_5G004750.1	GO:0004672(protein kinase activity);GO:0005524(ATP binding);GO:0006468(protein phosphorylation)	04016(MAPK signaling pathway - plant)	K20717	EC:2.7.11.25	PREDICTED: mitogen-activated protein kinase kinase kinase YODA-like [Cucumis sativus]	NA	4.98238	4.19184	4.8611	1.49516	1.48455	1.54777	1.98773	1.4023	1.43935	5.16234e-13	3.34086e-12	yes
MAPK	CsaV3_6G005430	CsaV3_6G005430	17673	CsaV3_6G005430.1	GO:0004707(MAP kinase activity);GO:0005524(ATP binding);GO:0006468(protein phosphorylation);GO:0007178(transmembrane receptor protein serine/threonine kinase signaling pathway);GO:0009069(serine family amino acid metabolic process)	04016(MAPK signaling pathway - plant)	K20538	EC:2.7.11.24	PREDICTED: mitogen-activated protein kinase 15 isoform X2 [Cucumis sativus]	NA	10.1826	9.67416	8.97905	6.30835	6.35222	6.62461	16.69	17.3313	17.5836	1.01239e-10	5.17503e-10	yes
MAPK	CsaV3_6G032360	CsaV3_6G032360	19178	CsaV3_6G032360.1	GO:0004707(MAP kinase activity);GO:0005524(ATP binding);GO:0006468(protein phosphorylation);GO:0007178(transmembrane receptor protein serine/threonine kinase signaling pathway);GO:0009069(serine family amino acid metabolic process)	04016(MAPK signaling pathway - plant);04075(Plant hormone signal transduction)	K14512	EC:2.7.11.24	PREDICTED: mitogen-activated protein kinase homolog MMK1 [Cucumis sativus]	NA	31.7417	22.7023	28.4838	15.4071	16.5093	20.8486	49.5178	44.9795	44.1855	1.99504e-09	8.81514e-09	yes
MAPK	CsaV3_6G043080	CsaV3_6G043080	20052	CsaV3_6G043080.1	GO:0004672(protein kinase activity);GO:0005524(ATP binding);GO:0006468(protein phosphorylation)	NA	NA	NA	PREDICTED: mitogen-activated protein kinase kinase kinase YODA isoform X2 [Cucumis sativus]	NA	12.7194	9.8998	12.791	12.8731	12.0397	9.86289	21.2504	20.9236	18.286	8.96888e-05	0.000208349	yes
MAPK	CsaV3_6G043320	CsaV3_6G043320	20076	CsaV3_6G043320.1	GO:0004672(protein kinase activity);GO:0005524(ATP binding);GO:0006468(protein phosphorylation)	04016(MAPK signaling pathway - plant)	K20716	NA	PREDICTED: mitogen-activated protein kinase kinase kinase 3-like [Cucumis sativus]	NA	33.7006	32.7139	37.0157	25.7688	26.2125	22.9165	42.0061	44.8114	41.4852	0.000710498	0.00141474	yes
ARF	CsaV3_2G001050	CsaV3_2G001050	3566	CsaV3_2G001050.1	GO:0003677(DNA binding);GO:0005634(nucleus);GO:0006355(regulation of transcription, DNA-templated);GO:0009725(response to hormone)	04075(Plant hormone signal transduction)	K14486	NA	PREDICTED: auxin response factor 19 isoform X1 [Cucumis sativus]	NA	111.396	106.301	103.749	139.363	145.092	159.556	547.036	517.299	425.967	4.85321e-28	9.86591e-27	yes
ARF	CsaV3_6G039630	CsaV3_6G039630	19707	CsaV3_6G039630.1	GO:0003677(DNA binding);GO:0005515(protein binding);GO:0005634(nucleus);GO:0006355(regulation of transcription, DNA-templated);GO:0009725(response to hormone)	04075(Plant hormone signal transduction)	K14486	NA	PREDICTED: auxin response factor 18 [Cucumis sativus]	NA	11.4982	8.91836	13.9537	19.9364	19.8564	18.3562	27.0003	28.2605	23.9408	5.91925e-07	1.9095e-06	yes
ARF	CsaV3_6G052060	CsaV3_6G052060	20950	CsaV3_6G052060.1	GO:0003677(DNA binding);GO:0005515(protein binding);GO:0005634(nucleus);GO:0006355(regulation of transcription, DNA-templated);GO:0009725(response to hormone)	04075(Plant hormone signal transduction)	K14486	NA	PREDICTED: auxin response factor 6 isoform X2 [Cucumis sativus]	NA	6.30349	5.29109	6.61835	5.07234	4.64688	4.18192	7.96932	8.50983	8.39553	0.000838665	0.00164839	yes
