# Supplementary material for: Comparative transcriptome analysis of cucumber fruit tissues reveals novel regulatory genes in ascorbic acid biosynthesis
Source: PeerJ journal article supplement (doi:10.7717/peerj.18327), 2024-10-25
Supplement: Supplementary_Table_8.xlsx [file Supplementary_Table_8.xlsx]

## Sheet: Sheet1
Sample	PMM	GME	GGP	AAO1	APX4	GR2
A1_1	0.446118	0.932558	0.143886	1.42113	1.26153	0.293462
A1_2	0.377785	0.839158	0.374261	1.31796	1.64636	0.472254
A1_3	0.66692	1.12587	0.198311	1.03223	1.80433	0.576686
A2_1	0.965916	2.15919	0.597227	1.91461	1.02193	0.275424
A2_2	1.26338	2.66527	0.440417	1.46094	1.48903	0.361521
A2_3	1.7358	2.83077	1.06981	1.33192	1.65307	0.446694
A3_1	0.000599665	3.56285	0.761391	1.27007	1.20328	0.299356
A3_2	0.000668672	3.35305	1.39614	1.31784	1.543	0.485112
A3_3	0.000861053	3.81474	0.463095	0.901225	1.65785	0.889859
B1_1	0.60107	0.968427	0.130316	1.19867	1.23357	2.06401
B1_2	0.626102	0.994861	0.344677	1.04861	1.13923	2.23763
B1_3	0.771563	0.89178	0.249109	1.15519	1.29985	2.12858
B2_1	0.747809	1.8391	1.0632	1.58837	4.84e-11	2.3936
B2_2	0.978918	1.64184	0.822147	1.36267	4.81689e-08	2.24492
B2_3	1.21364	1.36166	1.77232	1.53908	3.98804e-07	2.34531
B3_1	0.284092	1.88196	0.317266	2.31515	0.777969	1.61881
B3_2	0.530307	1.65289	0.961169	1.70933	0.512814	4.05148
B3_3	0.768471	1.88519	0.394222	1.65392	0.747228	4.04656
