# Supplementary material for: Comparative transcriptome analysis of cucumber fruit tissues reveals novel regulatory genes in ascorbic acid biosynthesis
Source: PeerJ journal article supplement (doi:10.7717/peerj.18327), 2024-10-25
Supplement: Supplementary_Table_9.xlsx [file Supplementary_Table_9.xlsx]

## Sheet: Table S9 Raw date ofAsA content
Standard curv
Concentration	0	20mol	40mol	60mol	80mol
Absorbance	0.709	1.466	2.13	2.89	3.632
	Sample	Absorbance
1	A1_1	1.019
2	A1_2	1.047
3	A1_3	1.104
4	A1_4	1.065
5	A1_5	1.055
6	A1_6	1.077
7	A2_1	0.707
8	A2_2	0.717
9	A2_3	0.721
10	A2_4	0.716
11	A2_5	0.714
12	A2_6	0.702
13	A3_1	1.001
14	A3_2	0.996
15	A3_3	0.999
16	A3_4	1.001
17	A3_5	1.005
18	A3_6	1.006
19	T-A1_1	2.0715
20	T-A1_2	2.2995
21	T-A1_3	2.35
22	T-A1_4	2.152
23	T-A1_5	2.233
24	T-A1_6	2.221
25	T-A2_1	2.0305
26	T-A2_2	2.117
27	T-A2_3	2.1275
28	T-A2_4	2.3165
29	T-A2_5	2.2005
30	T-A2_6	2.158
31	T-A3_1	2.105
32	T-A3_2	2.162
33	T-A3_3	2.0575
34	T-A3_4	2.113
35	T-A3_5	2.033
36	T-A3_6	2.136
37	B1_1	0.999
38	B1_2	1.017
39	B1_3	0.994
40	B1_4	1.018
41	B1_5	0.93
42	B1_6	0.995
43	B2_1	0.652
44	B2_2	0.654
45	B2_3	0.657
46	B2_4	0.661
47	B2_5	0.652
48	B2_6	0.659
49	B3_1	0.936
50	B3_2	0.932
51	B3_3	0.94
52	B3_4	0.937
53	B3_5	0.944
54	B3_6	0.936
55	T-B1_1	2.147
56	T-B1_2	2.165
57	T-B1_3	2.226
58	T-B1_4	2.1535
59	T-B1_5	2.2115
60	T-B1_6	2.22
61	T-B2_1	1.9835
62	T-B2_2	2.0093
63	T-B2_3	1.9735
64	T-B2_4	1.9845
65	T-B2_5	1.9605
66	T-B2_6	1.9778
67	T-B3_1	1.895
68	T-B3_2	2.0231
69	T-B3_3	2.0609
70	T-B3_4	1.9745
71	T-B3_5	1.9842
72	T-B3_6	2.0881

## Sheet: Absorbance
	Sample	Absorbance		mmol
1	A1_1	1.019		0.725213		7.25213		1.45043		1.51174	0.0380864
2	A1_2	1.047		0.745569		7.45569		1.49114
3	A1_3	1.104		0.787008		7.87008		1.57402
4	A1_4	1.065		0.758655		7.58655		1.51731
5	A1_5	1.055		0.751385		7.51385		1.50277
6	A1_6	1.077		0.767379		7.67379		1.53476
7	A2_1	0.707		0.498389		4.98389		0.996778		1.00526	0.0093259
8	A2_2	0.717		0.505659		5.05659		1.01132
9	A2_3	0.721		0.508567		5.08567		1.01713
10	A2_4	0.716		0.504932		5.04932		1.00986
11	A2_5	0.714		0.503478		5.03478		1.00696
12	A2_6	0.702		0.494754		4.94754		0.989508
13	A3_1	1.001		0.712127		7.12127		1.42425		1.42474	0.00494265
14	A3_2	0.996		0.708492		7.08492		1.41698
15	A3_3	0.999		0.710673		7.10673		1.42135
16	A3_4	1.001		0.712127		7.12127		1.42425
17	A3_5	1.005		0.715035		7.15035		1.43007
18	A3_6	1.006		0.715762		7.15762		1.43152
19	T-A1_1	2.0715		1.49038		14.9038		2.98076		3.19838	0.132809
20	T-A1_2	2.2995		1.65614		16.5614		3.31227
21	T-A1_3	2.35		1.69285		16.9285		3.3857
22	T-A1_4	2.152		1.5489		15.489		3.09781
23	T-A1_5	2.233		1.60779		16.0779		3.21558
24	T-A1_6	2.221		1.59907		15.9907		3.19813
25	T-A2_1	2.0305		1.46057		14.6057		2.92115		3.10702	0.127028
26	T-A2_2	2.117		1.52346		15.2346		3.04692
27	T-A2_3	2.1275		1.53109		15.3109		3.06218
28	T-A2_4	2.3165		1.6685		16.685		3.33699
29	T-A2_5	2.2005		1.58416		15.8416		3.16833
30	T-A2_6	2.158		1.55327		15.5327		3.10653
31	T-A3_1	2.105		1.51473		15.1473		3.02947		3.02378	0.0639931
32	T-A3_2	2.162		1.55617		15.5617		3.11235
33	T-A3_3	2.0575		1.4802		14.802		2.96041
34	T-A3_4	2.113		1.52055		15.2055		3.0411
35	T-A3_5	2.033		1.46239		14.6239		2.92478
36	T-A3_6	2.136		1.53727		15.3727		3.07454
37	B1_1	0.999		0.710673		7.10673		1.42135		1.41141	0.0428327
38	B1_2	1.017		0.723759		7.23759		1.44752
39	B1_3	0.994		0.707038		7.07038		1.41408
40	B1_4	1.018		0.724486		7.24486		1.44897
41	B1_5	0.93		0.66051		6.6051		1.32102
42	B1_6	0.995		0.707765		7.07765		1.41553
43	B2_1	0.652		0.458404		4.58404		0.916808		0.922382	0.00499583
44	B2_2	0.654		0.459858		4.59858		0.919716
45	B2_3	0.657		0.462039		4.62039		0.924078
46	B2_4	0.661		0.464947		4.64947		0.929894
47	B2_5	0.652		0.458404		4.58404		0.916808
48	B2_6	0.659		0.463493		4.63493		0.926986
49	B3_1	0.936		0.664872		6.64872		1.32974		1.33193	0.00542415
50	B3_2	0.932		0.661964		6.61964		1.32393
51	B3_3	0.94		0.66778		6.6778		1.33556
52	B3_4	0.937		0.665599		6.65599		1.3312
53	B3_5	0.944		0.670688		6.70688		1.34138
54	B3_6	0.936		0.664872		6.64872		1.32974
55	T-B1_1	2.147		1.54527		15.4527		3.09054		3.14894	0.047548
56	T-B1_2	2.165		1.55835		15.5836		3.11671
57	T-B1_3	2.226		1.6027		16.027		3.2054
58	T-B1_4	2.1535		1.54999		15.4999		3.09999
59	T-B1_5	2.2115		1.59216		15.9216		3.18432
60	T-B1_6	2.22		1.59834		15.9834		3.19668
61	T-B2_1	1.9835		1.4264		14.264		2.85281		2.84993	0.0214395
62	T-B2_2	2.0093		1.44516		14.4516		2.89032
63	T-B2_3	1.9735		1.41913		14.1913		2.83827
64	T-B2_4	1.9845		1.42713		14.2713		2.85426
65	T-B2_5	1.9605		1.40968		14.0968		2.81937
66	T-B2_6	1.9778		1.42226		14.2226		2.84452
67	T-B3_1	1.895		1.36206		13.6206		2.72413		2.88305	0.0916097
68	T-B3_2	2.0231		1.45519		14.5519		2.91039
69	T-B3_3	2.0609		1.48267		14.8267		2.96535
70	T-B3_4	1.9745		1.41986		14.1986		2.83972
71	T-B3_5	1.9842		1.42691		14.2691		2.85383
72	T-B3_6	2.0881		1.50245		15.0245		3.0049

## Sheet: Sheet2
A1	1.51174						AsA	DHA
A2	1.00526				H105	A1	1.51174	1.68664
A3	1.42474					A2	1.00526	2.10176
A1-T	3.19838					A3	1.42474	1.59904
A2-T	3.10702				H028	B1	1.41141	1.73753
A3-T	3.02378					B2	0.922382	1.92754
A1-DHA	1.68664					B3	1.33193	1.55113
A2-DHA	2.10176
A3-DHA	1.59904						0.896301
B1	1.41141						0.478295
B2	0.922382						0.890998
B3	1.33193						0.812308
B1-T	3.14894						0.478527
B2-T	2.84993						0.858682
B3-T	2.88305
B1-DHA	1.73753
B2-DHA	1.92754						0.0380864	0.0851353
B3-DHA	1.55113						0.0214133	0.0695246
							0.0249426	0.130441
							0.0428327	0.0663782
							0.0201589	0.08224
							0.0654242	0.141184
